# Supplementary material for: Designing stable closo-B12 dianions in silico for Li- and Mg-ion battery applications
Source: Royal Society of Chemistry journal article supplement (doi:10.1039/d1qi00994j), 2021-01-01
Supplement: d1qi00994j1.pdf [file d1qi00994j1.pdf]

*Electronic Supplementary Information (ESI) for*

## **Designing stable *closo*-B<sub>12</sub> dianions *in silico* for Li- and Mg-ion battery applications**

Jianzhi Xu,<sup>‡a</sup> Mengyang Li,<sup>‡a</sup> Song Xu,<sup>a</sup> Gerui Pei,<sup>a</sup> Chuncai Kong,<sup>a</sup> Xueguang Ren,<sup>a</sup>  
Zhimao Yang,<sup>a</sup> Tao Yang,<sup>\*a</sup> Jian Zhou,<sup>\*b</sup> and Gao-Lei Hou<sup>\*a,c</sup>

<sup>a</sup>*MOE Key Laboratory for Non-Equilibrium Synthesis and Modulation of Condensed Matter, School of Physics, Xi'an Jiaotong University, Xi'an 710049, Shaanxi, China. Email: taoyang1@xjtu.edu.cn*

<sup>b</sup>*Center for Alloy Innovation and Design, State Key Laboratory for Mechanical Behavior of Materials, Xi'an Jiaotong University, Xi'an 710049, Shaanxi, China. Email: jianzhou@xjtu.edu.cn*

<sup>c</sup>*Quantum Solid-State Physics, Department of Physics and Astronomy, KU Leuven, Celestijnenlaan 200D, 3001 Leuven, Belgium. Email: gaolei.hou@kuleuven.be*

## Contents

|                                                                    |     |
|--------------------------------------------------------------------|-----|
| Optimized geometries of $[B_{12}(XCE)_{12}]^{2-}$ .<br>.....       | S3  |
| Plots of frontier molecular orbitals.....                          | S4  |
| Simulated photoelectron spectra .<br>.....                         | S8  |
| Optimized geometries of MY salts.....                              | S9  |
| Gas-phase IR vibrations.....                                       | S10 |
| Bond length and bond angle of $[B_{12}(ECX)_{12}]^{2-/1-/0}$ ..... | S11 |
| Atomic charge distribution and bonding parameter<br>.....          | S11 |

| C<br>(2.55) | B<br>(2.04)                                                                                                                                                                       | N (3.04)                                                                                                                                                                          | P (2.19)                                                                                                                                                                             | As (2.18)                                                                                                                                                                          |
|-------------|-----------------------------------------------------------------------------------------------------------------------------------------------------------------------------------|-----------------------------------------------------------------------------------------------------------------------------------------------------------------------------------|--------------------------------------------------------------------------------------------------------------------------------------------------------------------------------------|------------------------------------------------------------------------------------------------------------------------------------------------------------------------------------|
|             | O (3.44)                                                                                                                                                                          | 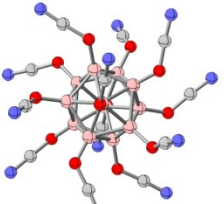<br>$[B_{12}(OCN)_{12}]^{2-} (C_1)$<br>EA1 = 7.86 eV<br>EA2 = 4.89 eV<br>$\Delta E = 15.66$ eV   | <br>$[B_{12}(OCp)_{12}]^{2-} (C_1)$<br>EA1 = 5.50 eV<br>EA2 = 2.99 eV<br>$\Delta E = 11.94$ eV      | <br>$[B_{12}(OCAs)_{12}]^{2-} (C_1)$<br>EA1 = 4.36 eV<br>EA2 = 2.45 eV<br>$\Delta E = 12.20$ eV |
| S (2.58)    | <br>$[B_{12}(SCN)_{12}]^{2-} (C_1)$<br>EA1 = 6.80 eV<br>EA2 = 4.29 eV<br>$\Delta E = 6.47$ eV    | <br>$[B_{12}(SCP)_{12}]^{2-} (C_1)$<br>EA1 = 4.99 eV<br>EA2 = 2.54 eV<br>$\Delta E = 0.33$ eV    | <br>$[B_{12}(SCAs)_{12}]^{2-} (C_1)$<br>EA1 = 4.67 eV<br>EA2 = 2.27 eV<br>$\Delta E = 0.64$ eV    |                                                                                                                                                                                    |
| Se (2.55)   | <br>$[B_{12}(SeCN)_{12}]^{2-} (C_1)$<br>EA1 = 6.69 eV<br>EA2 = 3.80 eV<br>$\Delta E = 7.17$ eV | <br>$[B_{12}(SeCP)_{12}]^{2-} (C_1)$<br>EA1 = 4.76 eV<br>EA2 = 2.27 eV<br>$\Delta E = 0.10$ eV | <br>$[B_{12}(SeCAs)_{12}]^{2-} (C_1)$<br>EA1 = 4.81 eV<br>EA2 = 2.04 eV<br>$\Delta E = 0.08$ eV |                                                                                                                                                                                    |

**Fig. S1** Optimized geometries of  $[B_{12}(XCE)_{12}]^{2-}$  ( $X = O, S,$  and  $Se$ ;  $E = N, P,$  and  $As$ ) and calculated first (EA1) and second (EA2) electron affinity of their corresponding neutrals.  $\Delta E$  represents the energy differences between  $[B_{12}(XCE)_{12}]^{2-}$  and  $[B_{12}(ECX)_{12}]^{2-}$ . Values in parentheses are the Pauling electronegativity of each atom and the symmetry of dianions is shown in parentheses under the molecular structures.

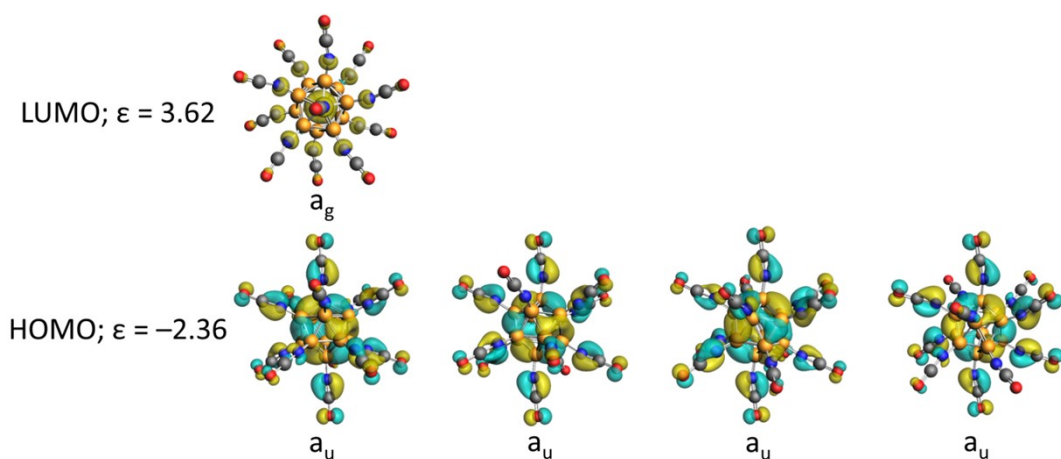

**Fig. S2** Plots of frontier molecular orbitals (isovalue = 0.03) of  $[B_{12}(NCO)_{12}]^{2-}$  at PBE0/TZ2P. The orbital energy eigenvalues are in eV.

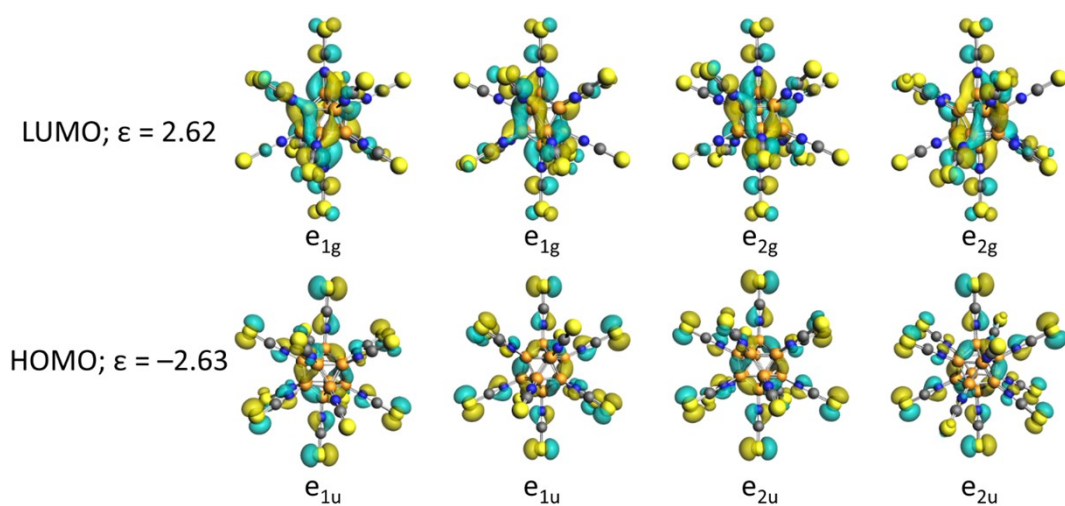

**Fig. S3** Plots of frontier molecular orbitals (isovalue = 0.03) of  $[B_{12}(NCS)_{12}]^{2-}$  at PBE0/TZ2P. The orbital energy eigenvalues are in eV.

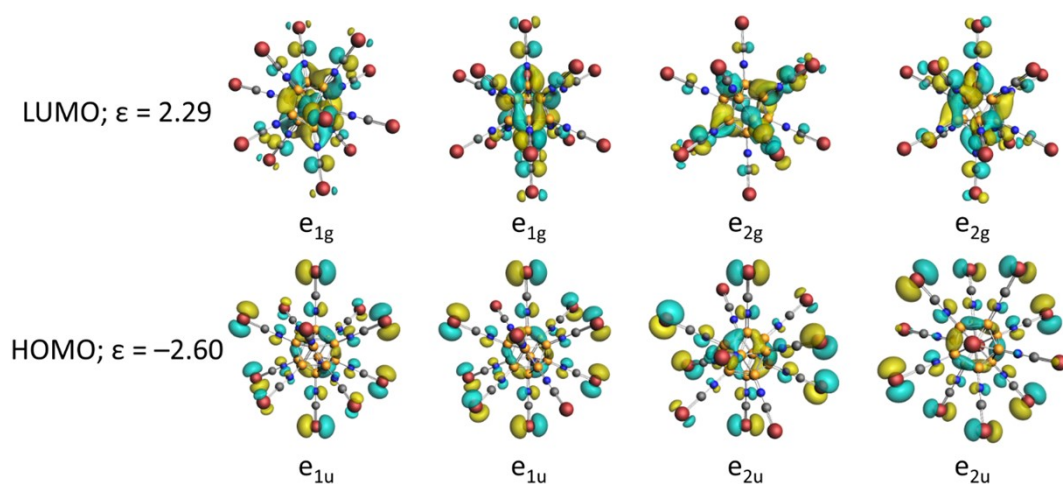

**Fig. S4** Plots of frontier molecular orbitals (isovalue = 0.03) of  $[B_{12}(NCSe)_{12}]^{2-}$  at PBE0/TZ2P. The orbital energy eigenvalues are in eV.

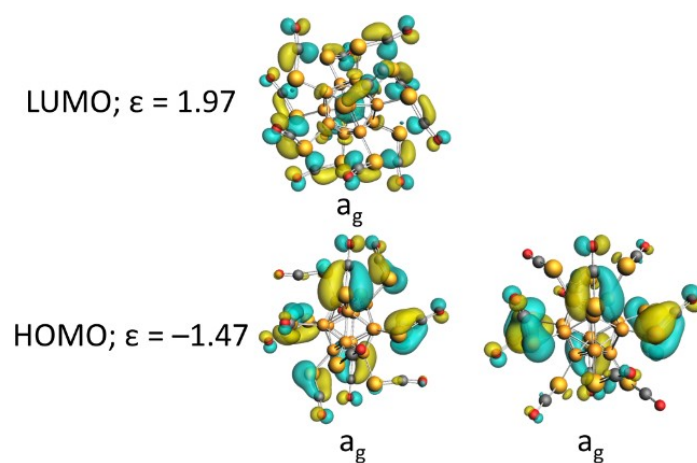

**Fig. S5** Plots of frontier molecular orbitals (isovalue = 0.03) of  $[B_{12}(PCO)_{12}]^{2-}$  at PBE0/TZ2P. The orbital energy eigenvalues are in eV.

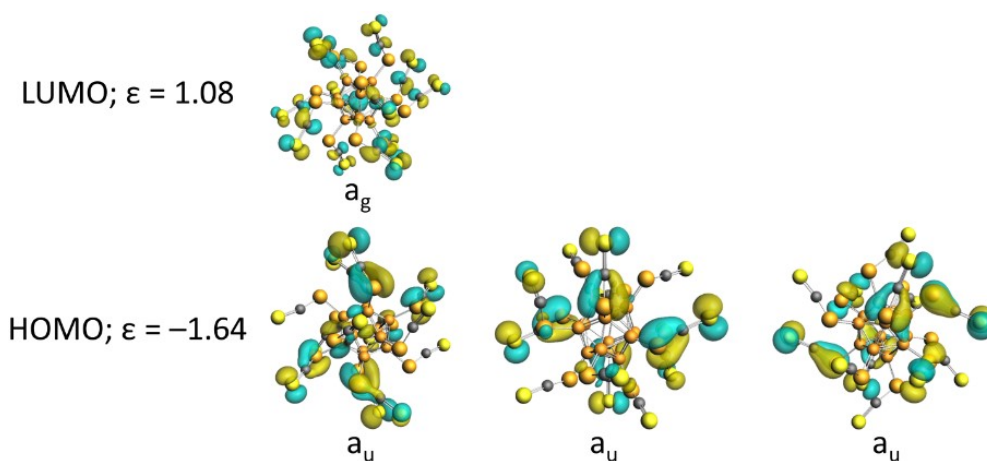

**Fig. S6** Plots of frontier molecular orbitals (isovalue = 0.03) of  $[B_{12}(PCS)_{12}]^{2-}$  at PBE0/TZ2P. The orbital energy eigenvalues are in eV.

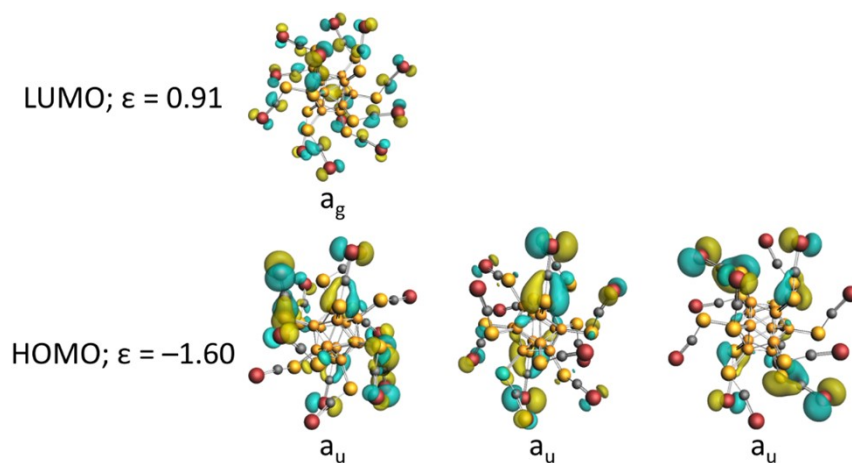

**Fig. S7** Plots of frontier molecular orbitals (isovalue = 0.03) of  $[B_{12}(PCSe)_{12}]^{2-}$  at PBE0/TZ2P. The orbital energy eigenvalues are in eV.

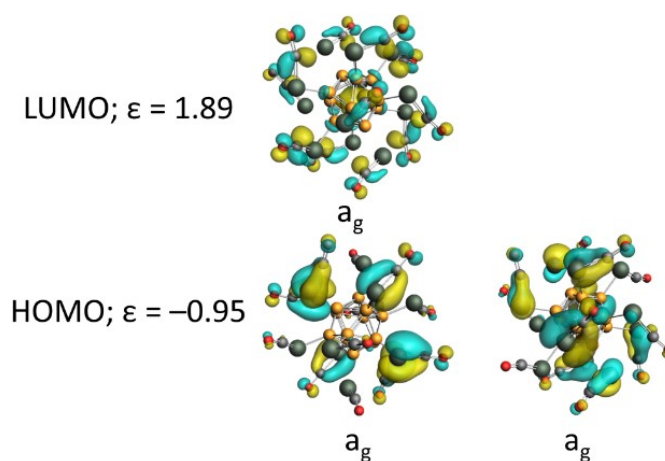

**Fig. S8** Plots of frontier molecular orbitals (isovalue = 0.03) of  $[B_{12}(AsCO)_{12}]^{2-}$  at PBE0/TZ2P. The orbital energy eigenvalues are in eV.

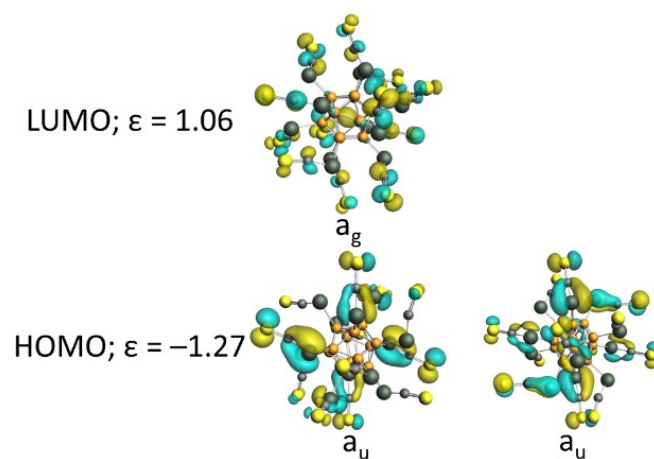

**Fig. S9** Plots of frontier molecular orbitals (isovalue = 0.03) of  $[B_{12}(AsCS)_{12}]^{2-}$  at PBE0/TZ2P. The orbital energy eigenvalues are in eV.

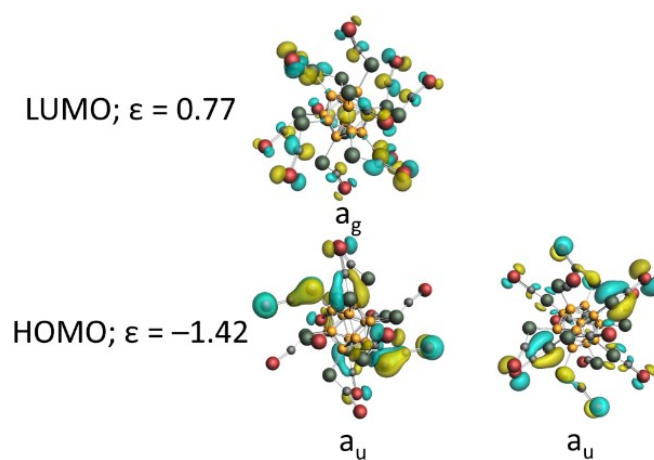

**Fig. S10** Plots of frontier molecular orbitals (isovalue = 0.03) of  $[B_{12}(AsCSe)_{12}]^{2-}$  at PBE0/TZ2P. The orbital energy eigenvalues are in eV.

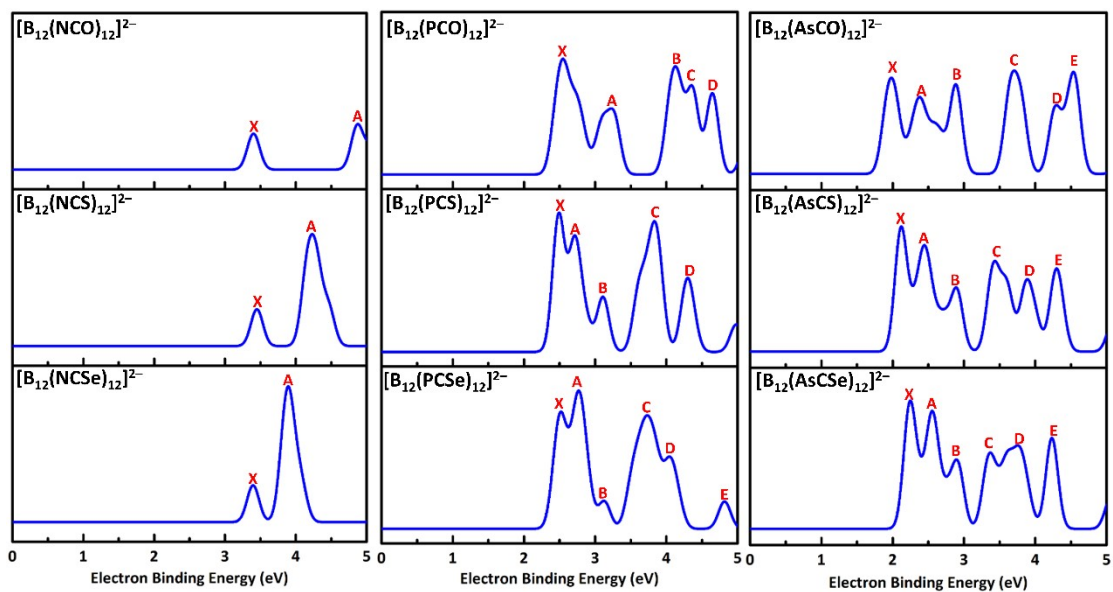

**Fig. S11** Simulated photoelectron spectra of  $[B_{12}(ECX)_{12}]^{2-}$  (E = N, P, and As; X = O, S, and Se) dianions.



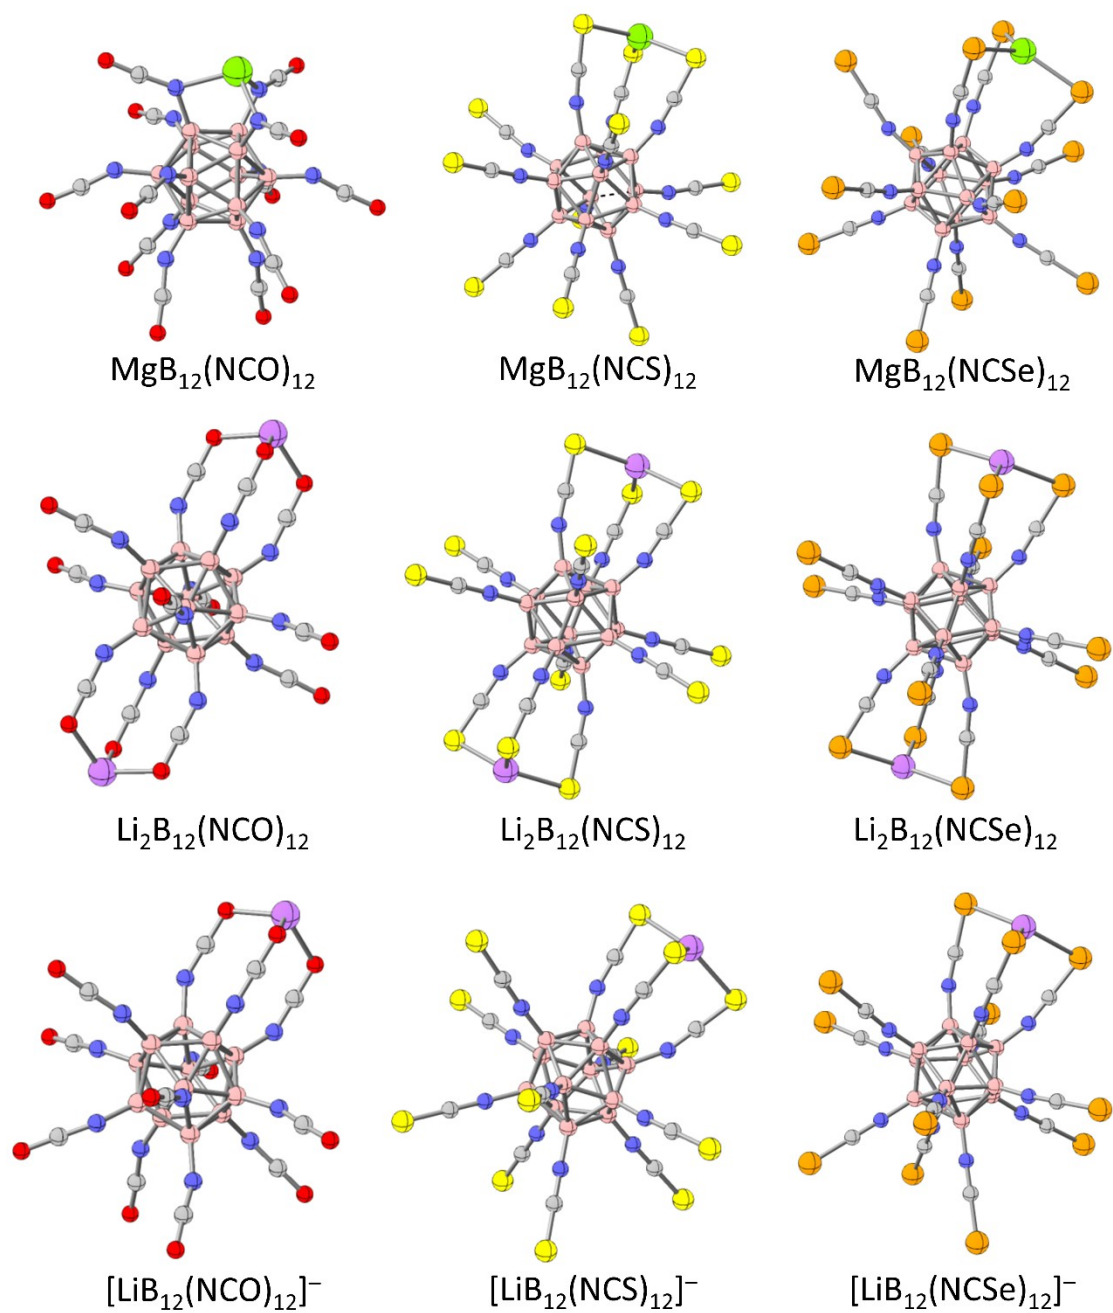

**Fig. S12** Optimized geometries of MY (M = Li or Mg, Y is corresponding *closo*-B<sub>12</sub> anion) salts.

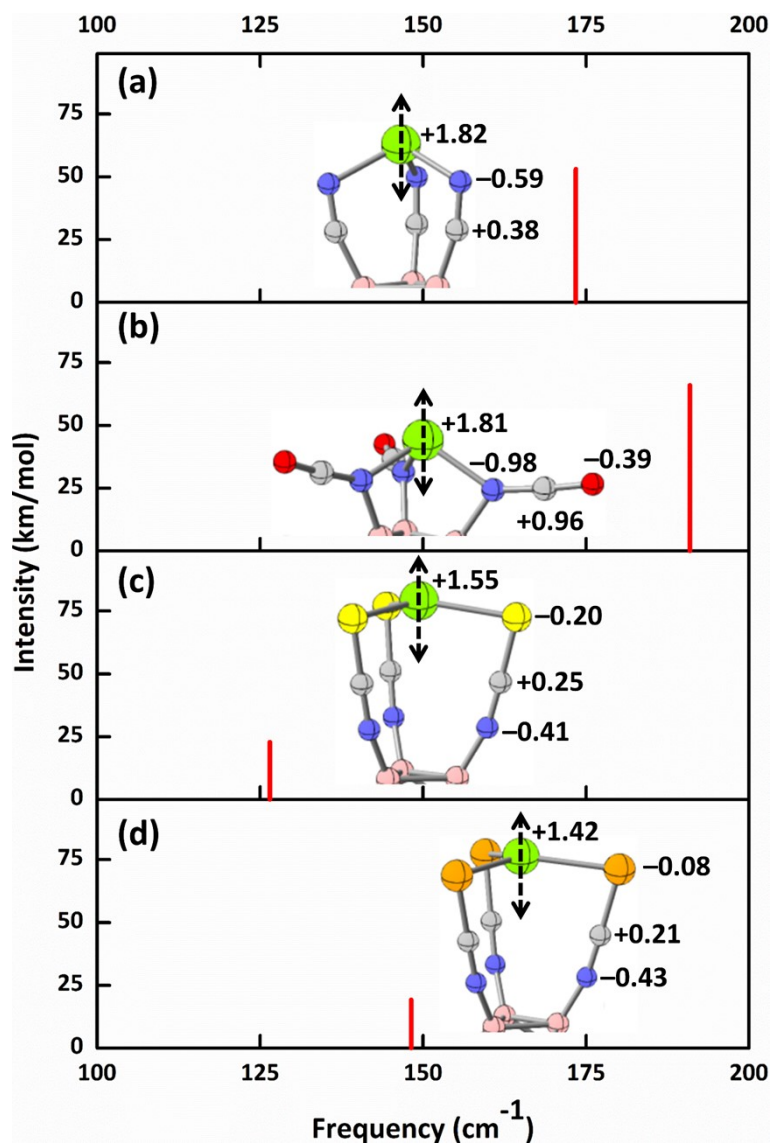

**Fig. S13** Gas-phase infrared vibrations of the metal cation ( $\text{Mg}^{2+}$ ) relative to the dianion in (a)  $\text{MgB}_{12}(\text{CN})_{12}$ , (b)  $\text{MgB}_{12}(\text{NCO})_{12}$ , (c)  $\text{MgB}_{12}(\text{NCS})_{12}$ , and (d)  $\text{MgB}_{12}(\text{NCSe})_{12}$ . Arrows signify the direction of vibration while the atomic charge is marked near the atom.

**Table S1** Bond length (in Å) and bond angle (in degree) of  $[B_{12}(ECX)_{12}]^{2-/-1-/0}$  (E = N, P, and As; X = O, S, and Se).

| Species                               | B–B <sup>a</sup> | B–E <sup>a</sup> | E–C <sup>a</sup> | C–X <sup>a</sup> | ∠BEC <sup>a</sup> |
|---------------------------------------|------------------|------------------|------------------|------------------|-------------------|
| B <sub>12</sub> (NCO) <sub>12</sub>   | 1.79(1.80)[1.85] | 1.45(1.44)[1.42] | 1.18(1.19)[1.20] | 1.18(1.17)[1.16] | 163°(154°)[149°]  |
| B <sub>12</sub> (NCS) <sub>12</sub>   | 1.80(1.81)[1.83] | 1.44(1.43)[1.42] | 1.18(1.18)[1.18] | 1.59(1.58)[1.57] | 180°(179°)[178°]  |
| B <sub>12</sub> (NCSe) <sub>12</sub>  | 1.80(1.81)[1.82] | 1.44(1.43)[1.42] | 1.17(1.18)[1.18] | 1.73(1.73)[1.72] | 180°(179°)[178°]  |
| B <sub>12</sub> (PCO) <sub>12</sub>   | 1.78(1.79)[1.79] | 1.96(1.96)[1.95] | 1.67(1.67)[1.69] | 1.16(1.15)[1.15] | 103°(101°)[101°]  |
| B <sub>12</sub> (PCS) <sub>12</sub>   | 1.79(1.78)[1.78] | 1.96(1.96)[1.96] | 1.64(1.65)[1.65] | 1.57(1.56)[1.55] | 106°(105°)[105°]  |
| B <sub>12</sub> (PCSe) <sub>12</sub>  | 1.78(1.78)[1.79] | 1.96(1.96)[1.96] | 1.63(1.64)[1.65] | 1.72(1.71)[1.71] | 106°(105°)[102°]  |
| B <sub>12</sub> (AsCO) <sub>12</sub>  | 1.78(1.79)[1.78] | 2.08(2.08)[2.07] | 1.82(1.83)[1.86] | 1.15(1.15)[1.14] | 102°(100°)[99°]   |
| B <sub>12</sub> (AsCS) <sub>12</sub>  | 1.78(1.78)[1.78] | 2.09(2.08)[2.09] | 1.78(1.80)[1.80] | 1.56(1.55)[1.55] | 104°(103°)[102°]  |
| B <sub>12</sub> (AsCSe) <sub>12</sub> | 1.78(1.78)[1.77] | 2.09(2.08)[2.07] | 1.78(1.78)[1.79] | 1.72(1.71)[1.70] | 104°(103°)[103°]  |

<sup>a</sup>Values in parentheses are for monoanions and values in brackets are for neutrals.

**Table S2** Atomic charge distribution and quantum theory of atoms in molecules bond parameter.

| Species                               | B <sub>12</sub> <sup>a</sup> | ECX <sup>a</sup> | B–X bond |        |
|---------------------------------------|------------------------------|------------------|----------|--------|
|                                       |                              |                  | ρ        | H/ρ    |
| B <sub>12</sub> (NCO) <sub>12</sub>   | 2.3(2.7)[2.9]                | −4.3(−3.7)[−2.9] | 1.177    | −0.893 |
| B <sub>12</sub> (NCS) <sub>12</sub>   | 2.1(2.2)[2.5]                | −4.1(−3.2)[−2.5] | 1.208    | −0.897 |
| B <sub>12</sub> (NCSe) <sub>12</sub>  | 2.2(2.4)[2.5]                | −4.2(−3.4)[−2.5] | 1.212    | −0.900 |
| B <sub>12</sub> (PCO) <sub>12</sub>   | −3.2(−3.3)[−3.5]             | 1.2(2.3)[3.5]    | 0.813    | −0.582 |
| B <sub>12</sub> (PCS) <sub>12</sub>   | −3.2(−3.2)[−3.3]             | 1.2(2.2)[3.3]    | 0.810    | −0.577 |
| B <sub>12</sub> (PCSe) <sub>12</sub>  | −3.2(−3.2)[−3.3]             | 1.2(2.2)[3.3]    | 0.811    | −0.577 |
| B <sub>12</sub> (AsCO) <sub>12</sub>  | −4.0(−4.2)[−4.3]             | 2.0(3.2)[4.3]    | 0.699    | −0.477 |
| B <sub>12</sub> (AsCS) <sub>12</sub>  | −4.0(−4.1)[−4.2]             | 2.0(3.1)[4.2]    | 0.683    | −0.472 |
| B <sub>12</sub> (AsCSe) <sub>12</sub> | −4.1(−4.2)[−4.3]             | 2.1(3.2)[4.3]    | 0.686    | −0.474 |

<sup>a</sup>Values in parentheses are for monoanions and values in brackets are for neutrals.
